**Diagnosis and Management of Pain Syndromes.** BY BERNARD E. FINNESON, M.D., F.A.C.S., Neurosurgeon, The Episcopal Hospital, Philadelphia. Illustrations by Barbara R. Finneson. Cloth. \$8.50. Pp. 261, with 166 illustrations. W. B. Saunders Company, Philadelphia, 1962.

This book provides a practical and useful guide to the management of pain problems so frequently encountered in the practice of medicine. The techniques described are widely accepted. The author has attempted to impart an orderly and logical approach to the management of pain problems.

The contents are divided as follows: Pain and Its Effects, Principles of Treatment, Headache, Facial Pain, Neck Pain and Cervicobrachial Neuralgia, Low Back Pain and Sciatica, Visceral Pain of the Chest and Abdomen, Pain of Peripheral Vascular Disease, Reflex Dystrophies, Nerve Compression Syndromes, Painful Scars, Post-herpetic Neuralgia and Intractable Pain and Cancer.

The book is well organized for quick reference to the most common pain problems. The index as well as the printing, paper and binding are excellent.

The book is highly recommended for all physicians in general practice and various specialties related to the treatment of various pain problems.

V. K. STOELTING, M.D.

**The Respirocardiac Resuscitation Course of the National Resuscitation Society.** BY PALUEL J. FLAGG, M.D., F.A.C.C., AND ROBERT M. HOSLER, M.D., F.A.C.S. Cloth. \$3.50. Pp. 64, with 17 illustrations and 5 tables. The National Resuscitation Society, Inc., 2 East 63rd St., New York 21, N. Y., 1962.

Most of the material in this volume appeared in a series of articles dealing with resuscitation "at the professional level" which were published in the American Journal of

Cardiology from June 1958 through August 1961; and the material forms much of the substance of the present course in Respiro-Cardiac Resuscitation sponsored by the National Resuscitation Society and conducted by Drs. Flagg and Hosler. The course itself is an expansion (to include cardiac resuscitation) of Dr. Flagg's earlier crusade to teach laryngoscopy and intubation under the auspices of the old Society for the Prevention of Asphyxial Death (which has now become the National Resuscitation Society). The anesthesiologist, therefore, will find that he is thoroughly familiar with the points covered in the discussions of such topics as asphyxia, hypoxia, respiration, oxygenation, tracheotomy, intubation, cardiac arrest, open and closed chest cardiac massage, ventricular fibrillation, and cardiac defibrillation. The book will be of value as a memento to those who have taken the Respiro-Cardiac Resuscitation Course, and as a guide for those who wish to organize similar courses.

DAVID M. LITTLE, JR., M.D.

**Malpractice Law Dissected for Quick Grasping.** BY CHARLES L. CUSUMANO. Cloth. \$10.00. Pp. 132. Medicine-Law Press, Inc., 42 Broadway, New York City, 1962.

This book, written by a lawyer practising in New York City for 33 years, makes the fundamentals of the law of medical malpractice clear for quick understanding. The legal aspects are plainly written so that the nonlegal mind can quickly grasp the meaning. Although primarily dealing with the law as it applies to doctors, the book also discusses its application to dentists, hospitals, and nurses. It carefully explains all the defenses available in malpractice cases and tells how a malpractice case is actually proved in court. There is a detailed table of contents which enables the reader to find subjects quickly. Any physician interested in the law of malpractice will find this a valuable source of information.

RICHARD FOREGGER, M.D.
